# Supplementary material for: Biorefinery of galacturonic acid using a biofuel cell as a reactor
Source: Royal Society of Chemistry journal article supplement (doi:10.1039/d2re00202g), 2022-01-01
Supplement: d2re00202g1.pdf [file d2re00202g1.pdf]

## Supplementary Information

### Biorefinery of Galacturonic Acid Using a Biofuel Cell as a Reactor

Tomoe Nakagawa,<sup>a,b</sup> Hayato Abe,<sup>b</sup> Tomoko Gessei,<sup>a</sup> Kouta Takeda,<sup>c</sup> Kiyohiko Igarashi,<sup>c</sup> and Nobuhumi Nakamura<sup>\*b</sup>

---

<sup>a.</sup> *Tokyo Metropolitan Industrial Technology Research Institute, 2-4-10 Aomi, Koto-ku, Tokyo 135-0064, Japan*

<sup>b.</sup> *Department of Biotechnology and Life Science, Tokyo University of Agriculture and Technology, 2-24-16 Nakacho, Koganei, Tokyo 184-8588, Japan*  
*E-mail: nobu1@cc.tuat.ac.jp (N. Nakamura)*

<sup>c.</sup> *Department of Biomaterials Sciences, Graduate School of Agriculture and Life Sciences, The University of Tokyo, 1-1-1 Yayoi, Bunkyo, Tokyo 113-8657, Japan*

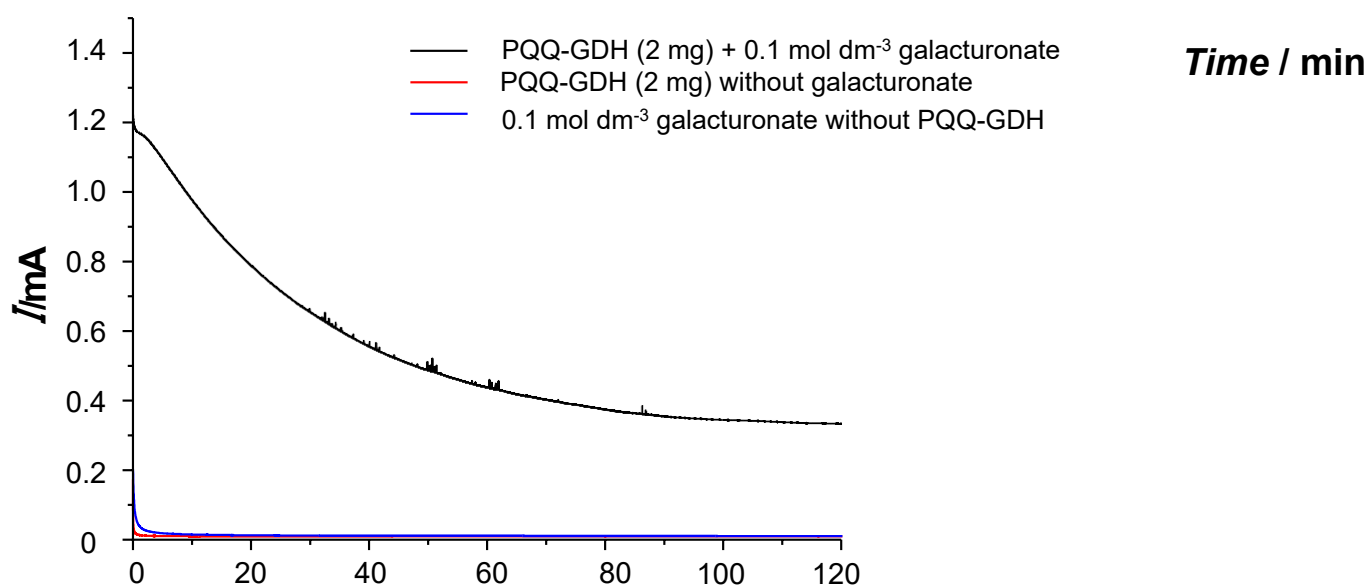

**Figure S1** Amperometric I-t curves for a PMG modified CF electrode. Measurements under conditions with enzyme and substrate (black), substrate and no enzyme (red), and enzyme and no substrate (blue).

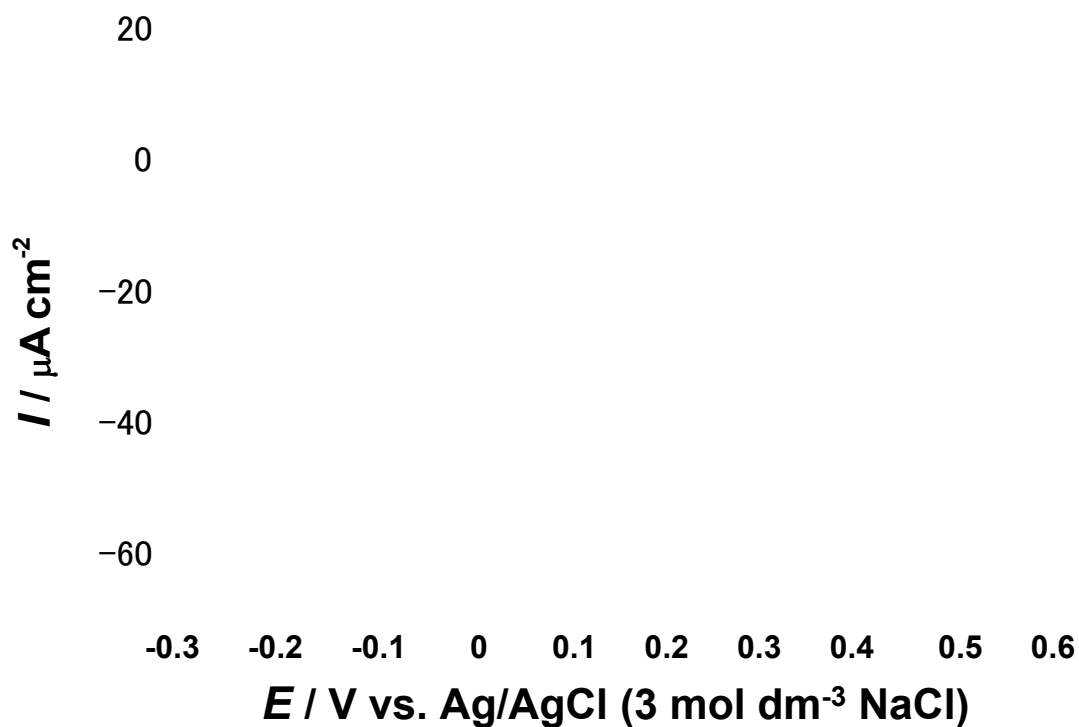

**Figure S2** CVs of the PQQ-GDH / PMG / PFC anode (magenta) and the BOD / PFC cathode (green) in 0.1 mol dm<sup>-3</sup> phosphate buffer (pH 7.0) containing 0.1 mol dm<sup>-3</sup> galacturonate under O<sub>2</sub> atmosphere at a rate of 2 mV s<sup>-1</sup>. Plastic formed carbon (PFC, 3 mm diameter) electrodes were used as base electrodes instead of CF electrodes. Dotted CVs are the results of control experiments. CV of the anode (magenta) in 0.1 mol dm<sup>-3</sup> phosphate buffer (pH 7.0) without galacturonate and CV of the cathode (green) in 0.1 m phosphate buffer (pH 7.0) with 0.1 mol dm<sup>-3</sup> galacturonate under N<sub>2</sub> atmosphere.

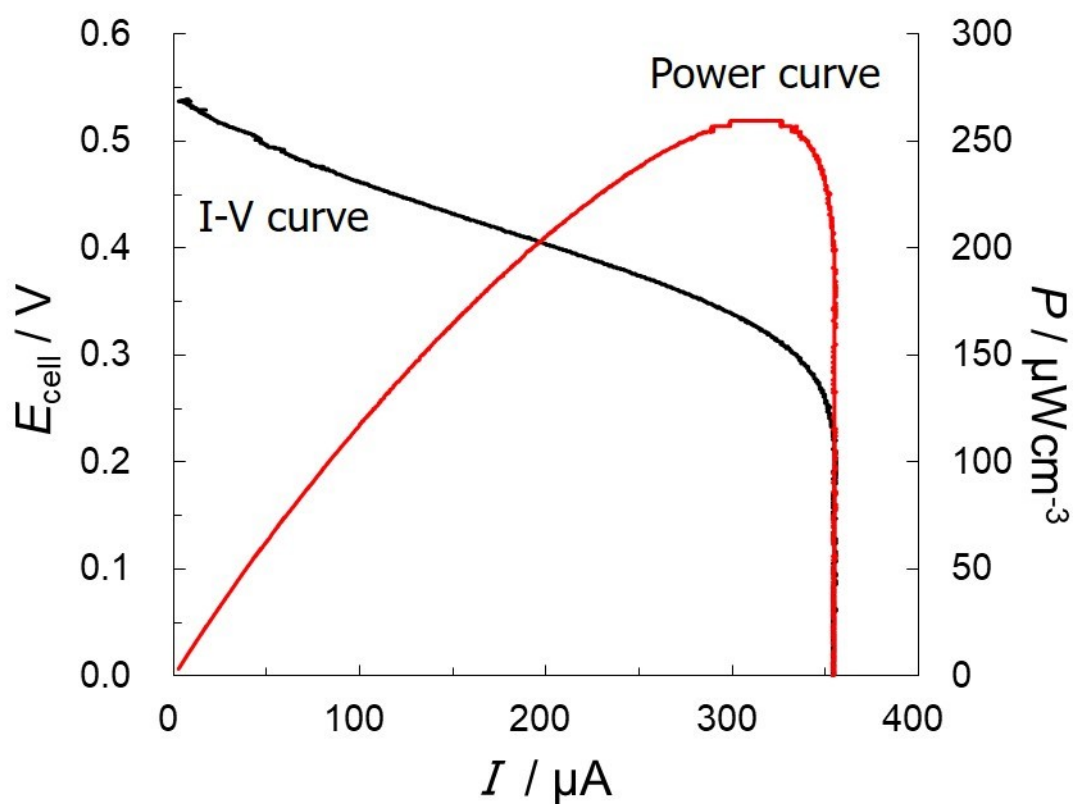

**Figure S3** The polarization curve (black) and power curve (red) of the EBFC obtained by LSV (vs. Ag/AgCl reference) under  $\text{O}_2$  bubbling (0.8 L/min). The voltage was swept from the OCV to 0 V at a rate of  $2 \text{ mV s}^{-1}$ . The electrolyte solution was  $0.1 \text{ mol dm}^{-3}$  galacturonic acid/buffer (7 mL). Carbon felt with a diameter of 10 mm and a thickness of 5 mm was used to prepare the electrodes. The anode consisted of PMG-CF modified with PQQ-GDH. The cathode consisted of bare CF modified with BOD.

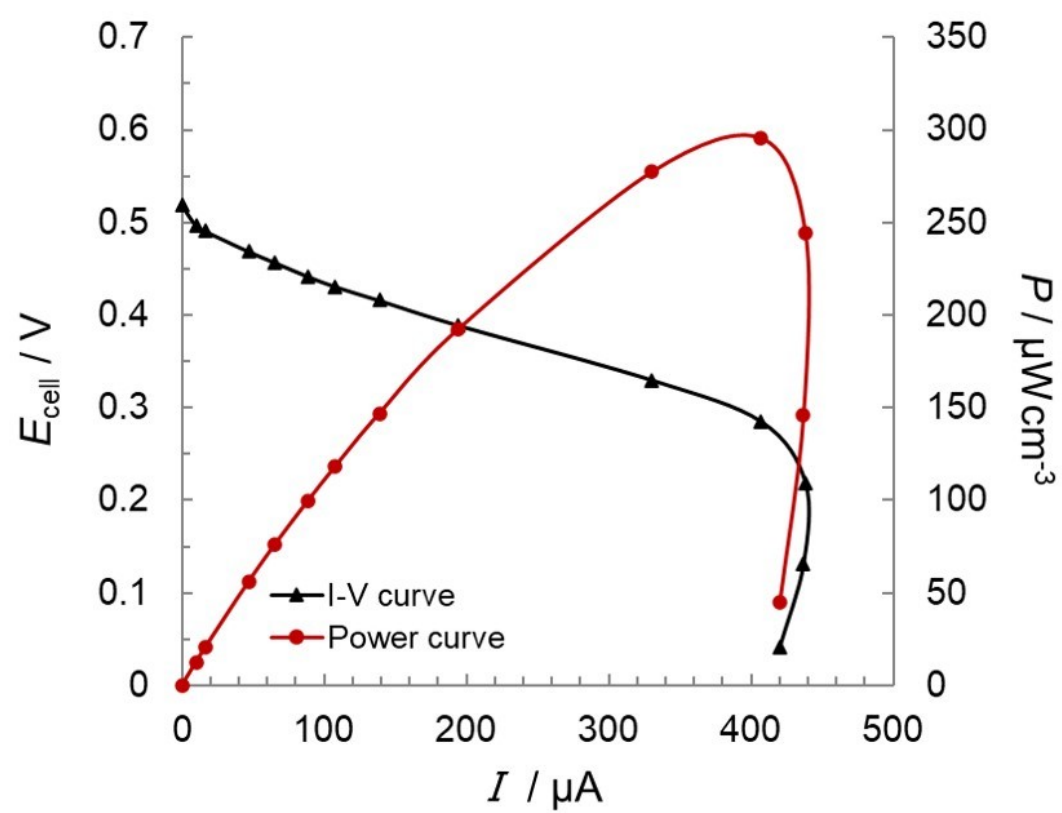

**Figure S4** The polarization curve (black) and power curve (red) of the EBFC using glucose as a substrate.

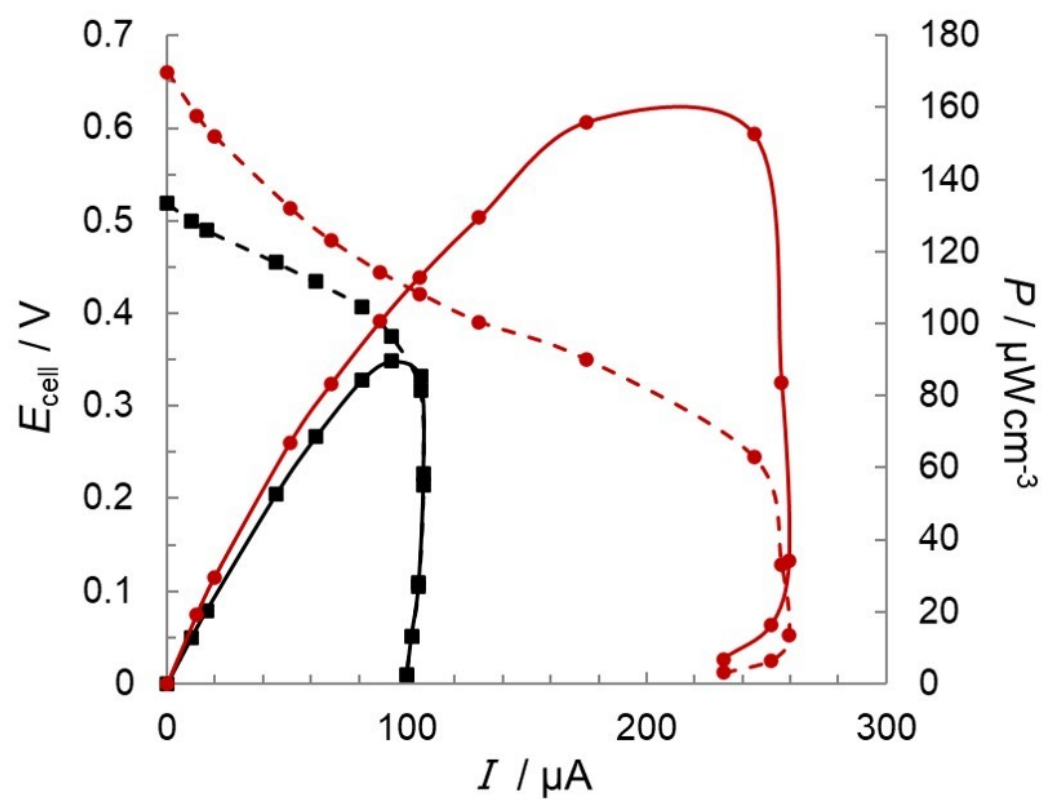

**Figure S5** The polarization curves (dotted lines) and power curves (solid lines) of the EBFCs with a Nafion membrane (red) and without membrane (black).

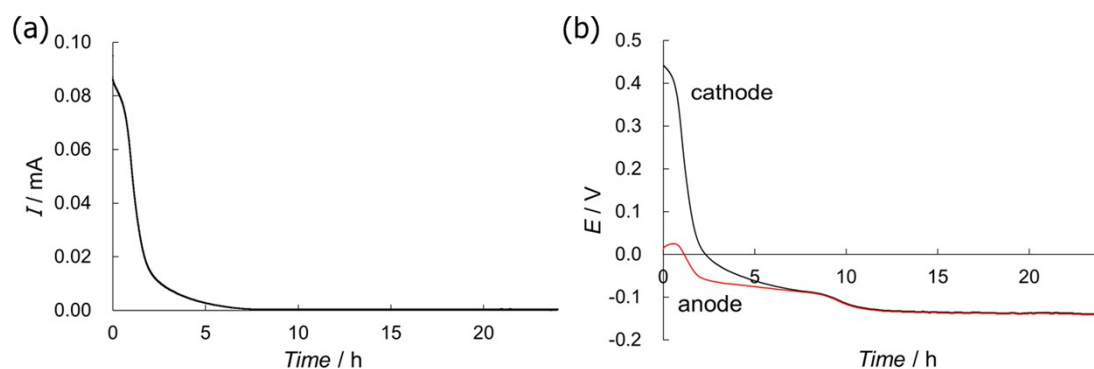

**Figure S6** Results obtained from a discharge experiment of the BFC using a 5-k $\Omega$  external resistance. O<sub>2</sub> (0.3 L/min) was bubbled through the reaction solution 5 minutes before, but not during, measurement. The electrolyte solution was a 0.1 mol dm<sup>-3</sup> galacturonic acid/deuterated buffer (7 mL). (a)  $I$ - $t$  curve and (b)  $V$ - $t$  curve of the cathode (black) and anode (red) vs. an Ag/AgCl reference. Carbon felt with a diameter of 10 mm and a thickness of 5 mm was used to prepare the electrodes. The anode was PMG-CF modified with PQQ-GDH. The cathode was bare CF modified with BOD.

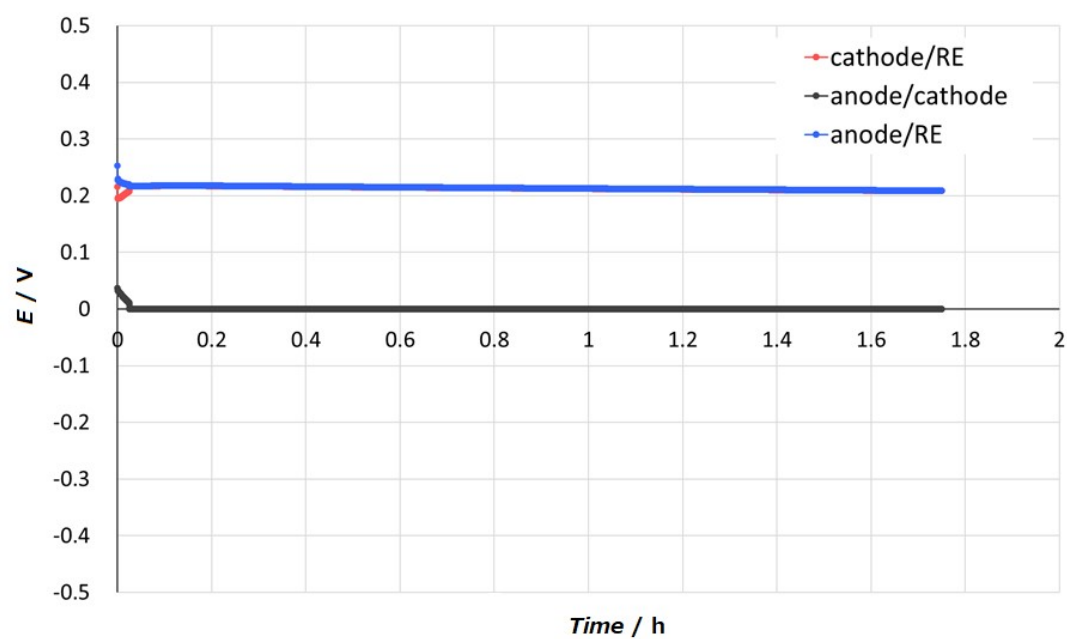

**Figure S7** V-t curve of the cathode (red) without BOD, anode without PQQ-GDH (blue), and cell (black). All conditions are the same as in Fig. 5 except for the absence of enzyme on both electrodes.

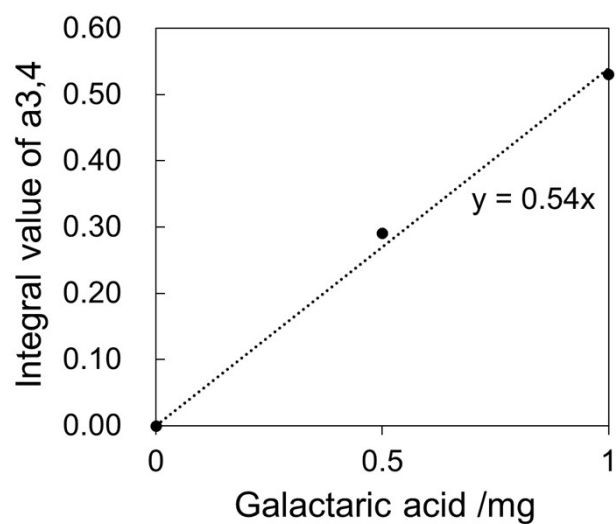

**Figure S8** Calibration curve of galactaric acid generated using NMR. The measurement solution was prepared by dissolving galactaric acid (0.29 mg, 0.53 mg) in 500  $\mu$ L of a deuterated buffer and adding DSS (0.5 mg/5  $\mu$ L). The integrated intensity of the 3.95 ppm peak of galactaric acid ( $\alpha_{3,4}$ ) was calculated using an integrated intensity of 1 for the 0 ppm peak of DSS.

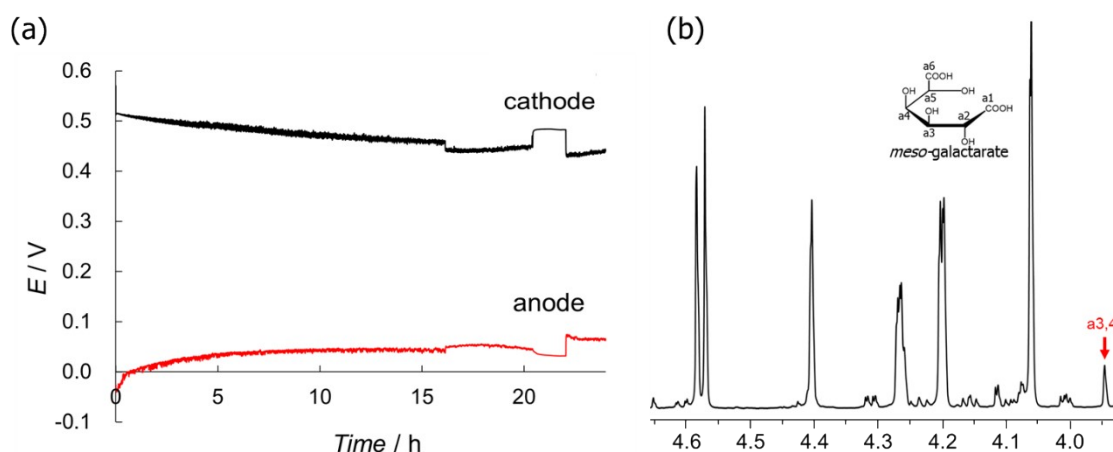

**Figure S9** (a)  $V$ - $t$  curve measured without a load resistance under  $O_2$  bubbling (0.9 L/min). The changes in the potentials of the cathode (black) and anode (red) vs. an Ag/AgCl reference are shown. (b) The NMR spectrum obtained for the reaction solution after a 24-h period. The relative integrated intensity of the a3,4 peak (red arrow) is 0.13 for an integrated intensity of 1 for the 0 ppm peak of DSS and is used in conjunction with the calibration curve shown in Figure S8 to yield 0.24 mg of galactaric acid in 500  $\mu$ L. The electrolyte solution was a 0.1 mol  $dm^{-3}$  galacturonic acid/deuterated buffer (7 mL). Carbon felt with a diameter of 10 mm and a thickness of 5 mm was used to prepare the electrodes. The anode was PMG-CF modified with PQQ-GDH. The cathode was bare CF modified with BOD.
